# Supplementary material for: Distinct transcription factor complexes act on a permissive chromatin landscape to establish regionalized gene expression in CNS stem cells
Source: HighWire-hosted journal article supplement (doi:10.1101/gr.203513.115), 2016-05-02
Supplement: Supplemental_Material.docx [file Supplemental_Material.docx]

**SUPPLEMENTAL INFORMATION**

**TABLE OF CONTENT**

**1. Supplemental methods**

**2. Supplemental references**

**1. Supplemental methods**

**Motif detection and scanning** DNA sequence motif detection (both *de novo* and based on known motifs) and scanning for the presence of specific motifs was performed using the findMotifsGenome.pl script in HOMER (v. 4.6) (Heinz et al. 2010), both for ChIP-seq and DNase-seq peaks.

**Gene ontology analysis** Gene ontology enrichment analysis was performed using the Panther classification system. Comparative gene ontology analysis fold changes were calculated by dividing the enrichment of a single term within the group of interest by the enrichment for that same term in all groups considered.

**VISTA database comparison** All enhancers in the database that showed expression in any of ‘neural tube’, ‘midbrain’, ‘hindbrain’ or ‘forebrain’ were extracted and analyzed for overlap with our DHS regions. We then compared the specificity of our DHSs or SOX2 peaks to the VISTA enhancer’s classifications of the overlapping regions, based on their expression in ‘forebrain’, caudal neural tube (‘hindbrain’ or ‘midbrain’) or both.

**Gene expression enrichment** In order to compare the relative overlap enrichment of gene sets of different sizes, we took the number of overlapping genes between two gene sets (ie. enhancer set’s nearest genes and specifically expressed gene set) and divided that by the multiple of the number of genes in each group.

**DNase I footprints**

DNase I footprints were called from the DNase-seq data using the Wellington algorithm implemented in the pyDNase package (Piper et al. 2013) with default parameters except for -fdrlimit set to -5, yielding 90,871 inferred footprints in E11 spinal cord and 88,794 footprints in E11 cortex.

**Co-Immunoprecipitation**

Co-Immunoprecipitation was performed as described in (Hagey and Muhr 2014).

**In utero electroporation, Immunohistochemistry, RNA-seq and target feature enrichment**

In utero electroporation, FACS and RNA-seq were performed according to (Hagey and Muhr 2014). For immunohistochemistry, cortices were prepared and stained as described in (Hagey and Muhr 2014) using primary antibodies against ASCL1 (1:1000; CosmoBio SK-T01-003) and PRDM12 (1:500; Millipore ABE95). Upregulation statistics are based on 3 electroporations from each condition, with image levels normalized in parallel and counting of overlap done by hand.

Target gene deregulation was determined using Deseq. Genes up- or downregulated greater than four fold, with p-adjust values less than 0.01, as well as genes regulated less than 1.05 fold, with p-adjust values greater than 0.05, were isolated for further analysis. All enhancers within 50 kb of any of the selected genes were then analyzed for the presence of the various features displayed in Fig. 4 and Supplementary fig. 7.

**Statistical modelling** To create a data matrix for modelling differential expression between spinal cord and cortex samples (abbreviated SC and Ctx below), we first defined a set of putative enhancers consisting of the union of all DNase-seq peaks in SC, Ctx or WW6 embryonic stem cells. For each of these putative enhancers, we collected the following features:

- number of SOX2 peaks in SC and Ctx, (*sc_SOX2no, ctx_SOX2no*)
- sum of SOX2 peak heights as reported by SISSRs, averaged across duplicates (*sc_SOX2score, ctx_SOX2score*),
- Hotelling score (a measure of enrichment) of the DNase-seq peak as reported by DFilter (*sc_dhs, ctx_dhs*)
- Mean conservation across the enhancer based on a multiple alignment of 30 vertebrate species as reported in the *phylop30way* track in the UCSC Genome Browser (Karolchik et al. 2004) (*meancons*)
- Number of HOX motif matches as reported by HOMER (*HOX*),
- Number of LHX motif matches as reported by HOMER (*LHX*).

We then collected, for each enhancer, all genes that had an (ENSEMBL annotated) transcription start site within 500 kbp from the enhancer. For each such gene, we added a matrix entry (row) with the enhancer ID, the gene ID, the enhancer features listed above (*sc_SOX2no*, etc.), and the RNA-seq expression (log2) fold change, as reported by DESeq2, for the gene in question. This, accordingly, resulted in a very large intermediate matrix of enhancer-gene pairs. To collapse this matrix into one that has exactly one row per gene, we calculated a weighted sum of each feature in all the enhancers that were coupled to the same gene. The weights were based on the distance between the gene and the enhancer through the relationship

**weight = exp(-3d/500000)**

where d is the distance between the gene and the enhancer, defined as the smallest absolute distance between the gene's TSS and the start or end coordinate of the enhancer region. It is easily verified that an enhancer overlapping the TSS (d=0) would get a weight of 1, an enhancer 50 kpb from the TSS would get a weight of ~0.74, and an enhancer 500 kbp from the TSS would get ~0.05.

In this way, we obtained a (gene x feature) matrix where the feature values for each gene were distance-weighted sums of the features described above. This matrix was further pre-processed by taking logarithms of some features (the SOX2 score features and the DHS features) to get feature values on approximately the same scale ahead of statistical modelling. In addition, we introduced two derived features: *dhs_log2fc*, defined as log2((sc_dhs+a)/(ctx_dhs+b)), where a is the smallest nonzero value of sc_dhs, and b is the smallest nonzero value of ctx_dhs, and *SOX2score_fc*, which is defined in a completely analogous way but for sc_SOX2score and ctx_SOX2score instead. In addition, we reduced the matrix to contain only those genes (N=4,540) that we considered SOX2 bound (genes that had at least one SOX2 peak for SC or Ctx in one of its putative enhancers).

Using the resulting matrix, we first modelled the RNA-seq expression (log2) fold change between SC and Ctx as a function of the other features using random forest regression and linear modelling with stepwise feature selection in the R statistical computing language. For this and the following models, the data set was divided into a training set and a test set, the latter of which was only used for a final evaluation of the model after fitting. For modelling the DHS score log2 fold change (*dhs_fc*) we only used the SOX2 related features, HOX, LHX and *meancons,* and for modelling SOX2 score log2 fold change (*SOX2score_fc*), we only used HOX, LHX and *meancons*.

**2. Supplemental references**

Hagey DW, Muhr J. 2014. SOX2 Acts in a Dose-Dependent Fashion to Regulate Proliferation of Cortical Progenitors. *Cell Rep* **9**: 1908–1920.

Heinz S, Benner C, Spann N, Bertolino E, Lin YC, Laslo P, Cheng JX, Murre C, Singh H, Glass CK. 2010. Simple combinations of lineage-determining transcription factors prime cis-regulatory elements required for macrophage and B cell identities. *Mol Cell* **38**: 576–589.

Karolchik D, Hinrichs AS, Furey TS, Roskin KM, Sugnet CW, Haussler D, Kent WJ. 2004. The UCSC Table Browser data retrieval tool. *Nucleic Acids Research* **32**: D493–6.

Piper J, Elze MC, Cauchy P, Cockerill PN, Bonifer C, Ott S. 2013. Wellington: a novel method for the accurate identification of digital genomic footprints from DNase-seq data. *Nucleic Acids Research* **41**: e201–e201.
